# Supplementary material for: WITHDRAWN: Overexpression of cotton PLATZ transcription factors GhPLATZ01 and GhPLATZ15 improves the drought resistance of tomato
Source: Research Square preprint supplement (doi:10.21203/rs.3.rs-6874178/v1), 2025-06-30
Supplement: Supplementary file 1 [file 45aaf9fded23ec8d4508b1bb.docx]

**Supplementary Materials**

**Overexpression of cotton PLATZ transcription factors *GhPLATZ01* and *GhPLATZ15* improves the drought resistance of tomato**

Tao Liu,[1](#h),Baotang Wu,[1](#h), Yao Zhang, Zhongqing Li, Yanhua Xue, Xiaoqin Ding , Zhihui Yang, Jianbo Zhu*· &  [Ruina Liu](https://bmcplantbiol.biomedcentral.com/articles/10.1186/s12870-025-06777-3" \l "auth-Ruina-Liu-Aff1)*

Corresponding Author:

Jianbo Zhu

Tel: 86993- 2057515, Fax: 86993-2057262, E-mail address: [zhujianboshz@163.com.](mailto:zhujianboshz@163.com)

[Ruina Liu](https://bmcplantbiol.biomedcentral.com/articles/10.1186/s12870-025-06777-3" \l "auth-Ruina-Liu-Aff1)

E-mail address:<shuilingzi123_4@126.com>

1 These authors contributed equally to this work.


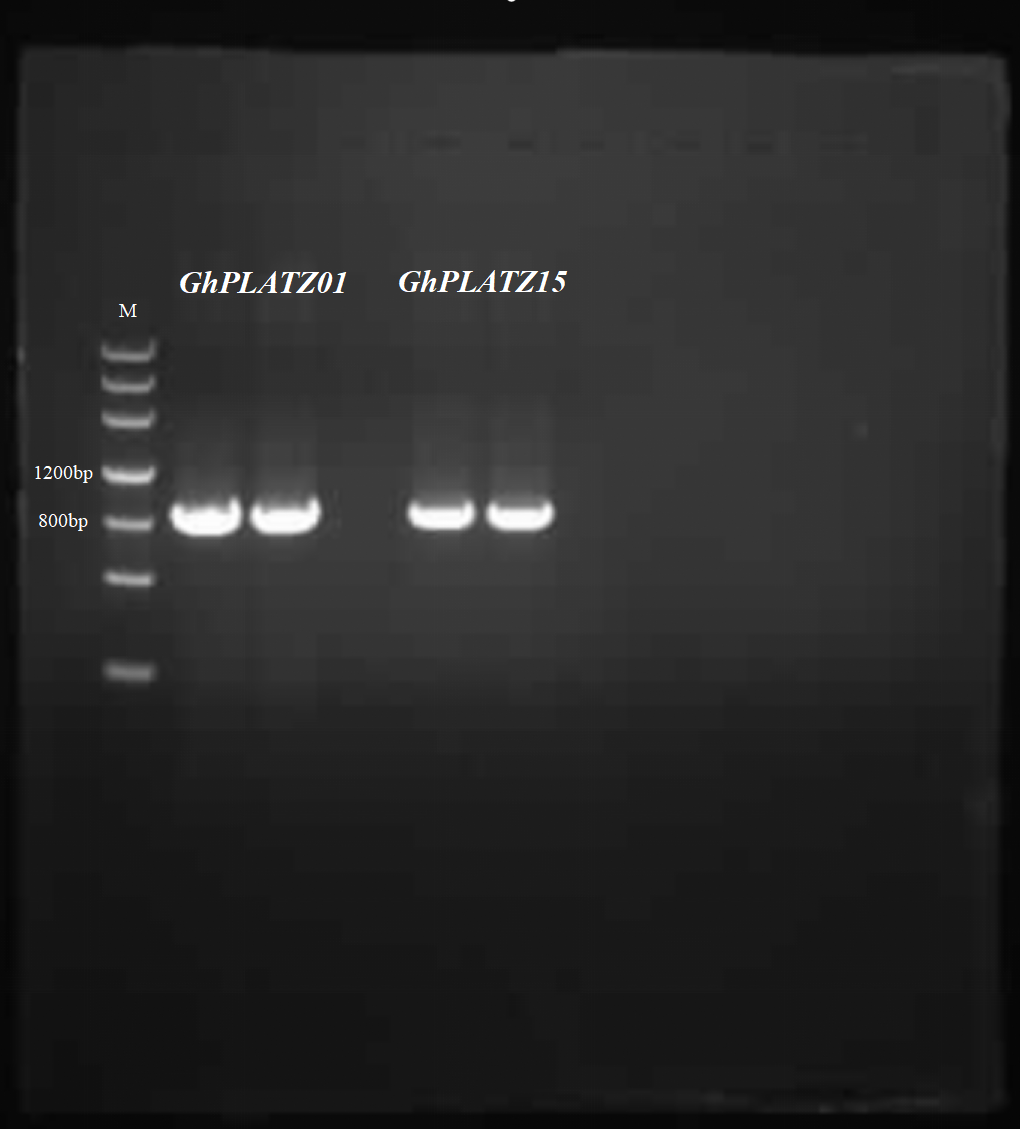


Supplementary Materials.1. Cloning of *GhPLATZ01&15* gene; M: Marker3


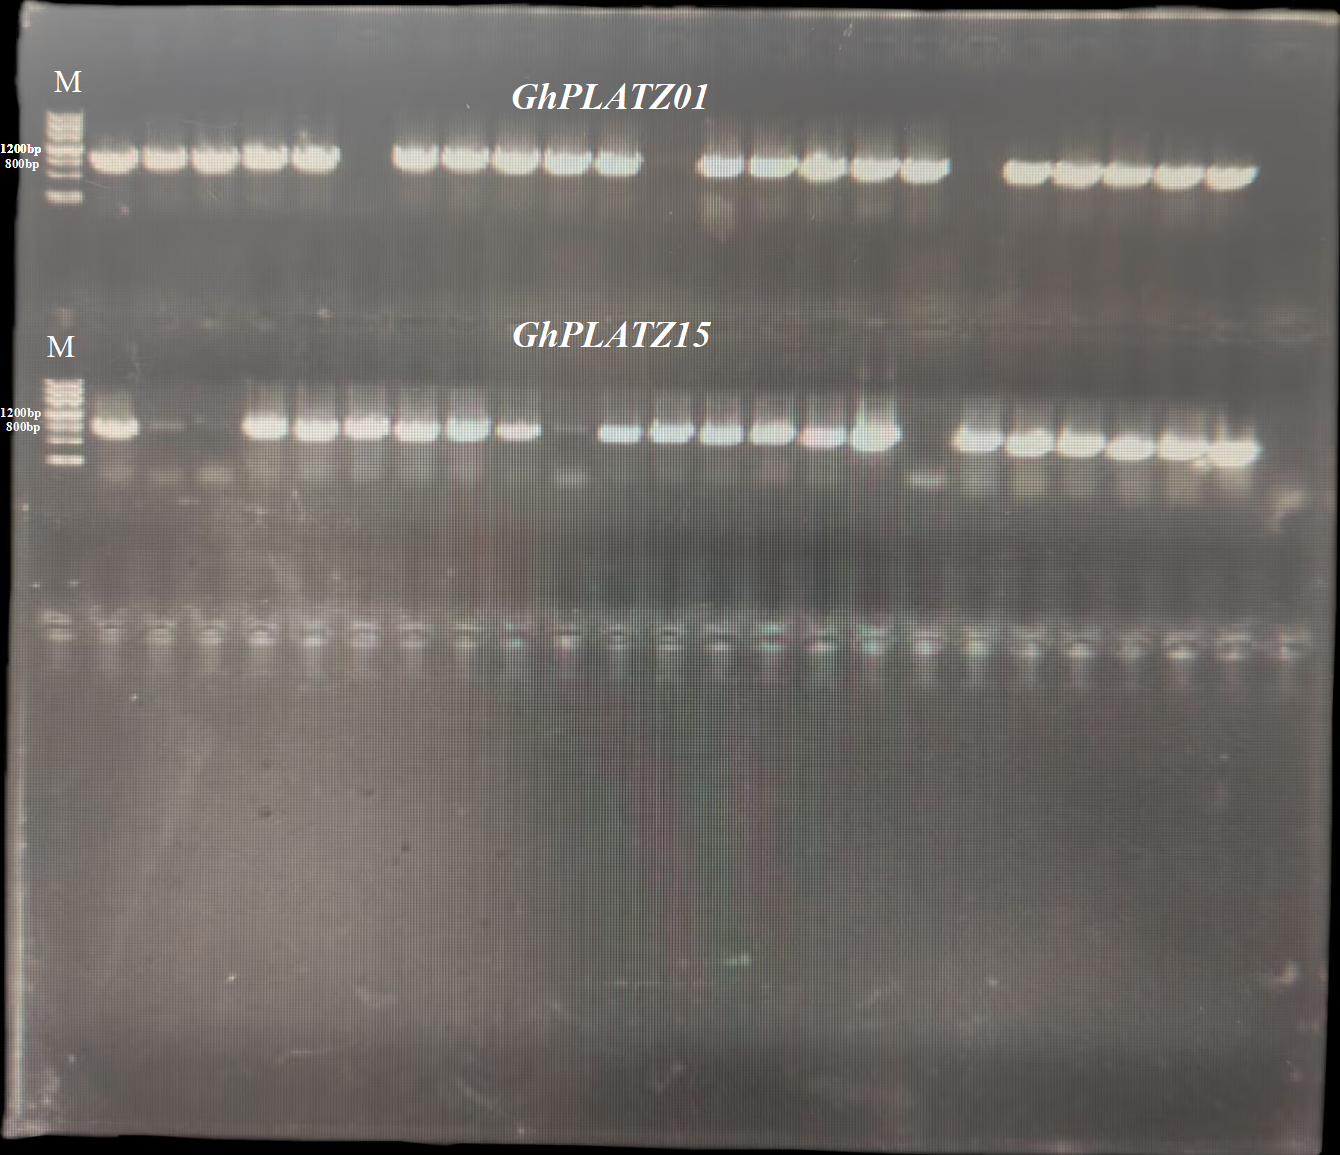


Supplementary Materials.2. PCR results of *GhPLATZ01&15* bacterial liquid; M: Marker3


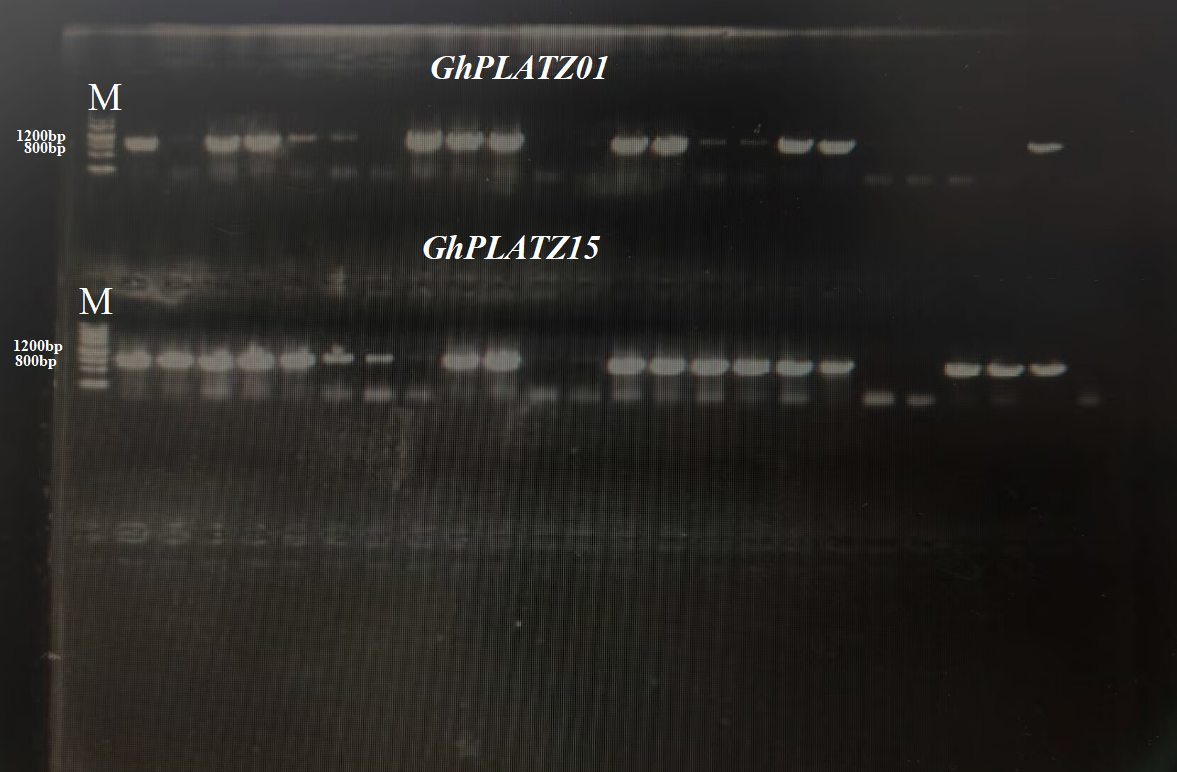


Supplementary Materials.3. PCR identification of Agrobacterium; M: Marker3


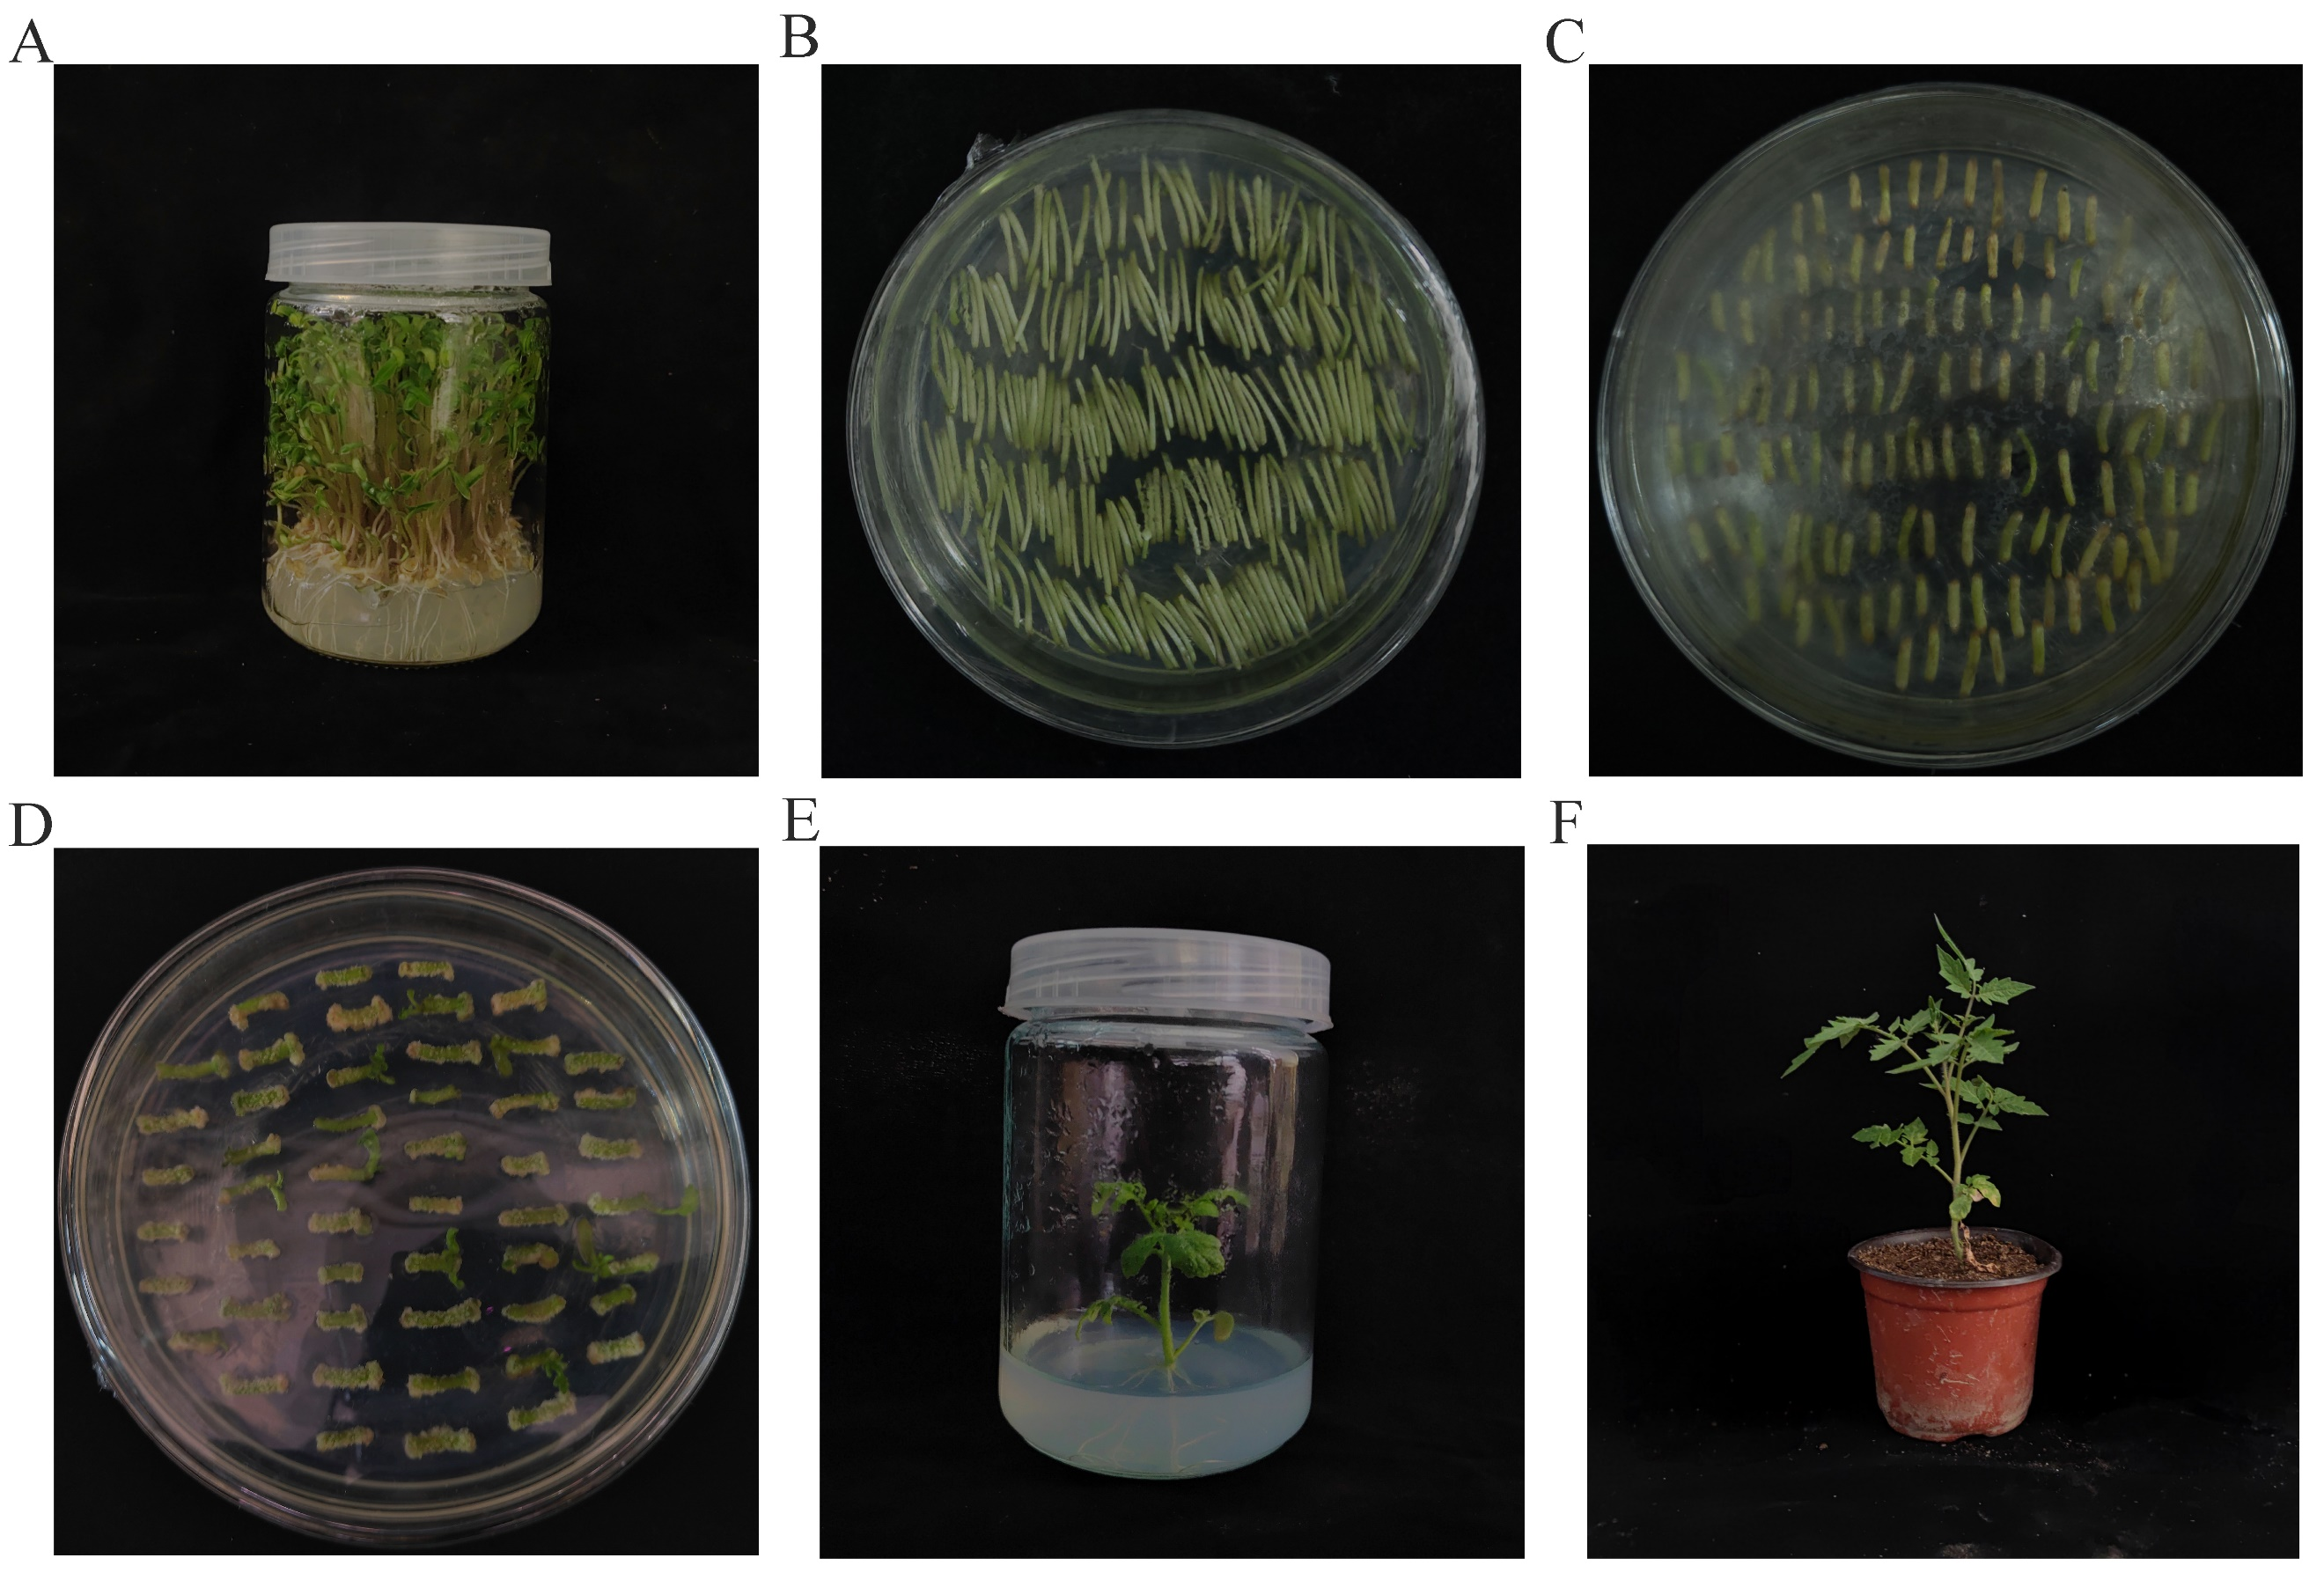


Supplementary Materials.4. Genetic transformation of tomatoes


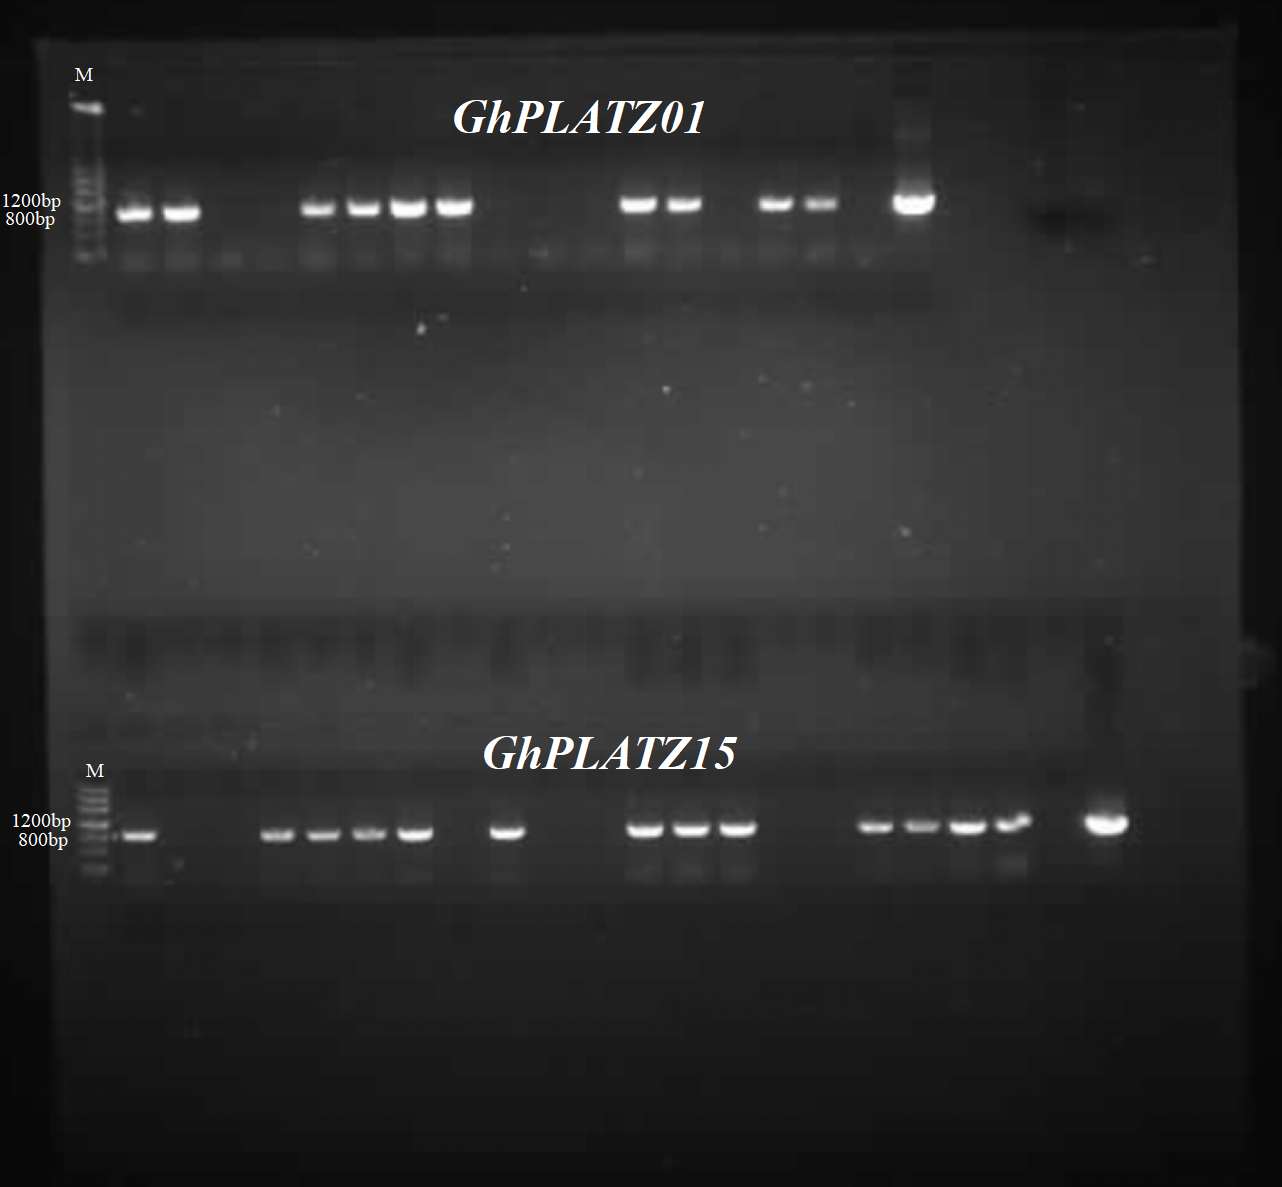


Supplementary Materials.5. Identification of tomatoe positive plants;M: Marker3

Supplementary Materials.6. The primers used in this study

| Primer name | Primer sequence | Primer length（bp） |
| --- | --- | --- |
|  | | |
| GhPLATZ01-RT-F | CTAGGCCTGGCAAAGGTGTC | 20 |
| GhPLATZ01-RT-R | CATCCGACCCGTCTGTTTCC | 20 |
| GhPLATZ15-RT-F | ACCTGTGAAGTCTGTGAGCG | 20 |
| GhPLATZ15-RT-R | GTTGTTGTTGCTGTTCTTGAGAT | 23 |
| GhUBQ14-RT-F | CAACGCTCCATCTTGTCCTT | 20 |
| GhUBQ14-RT-R | TGATCGTCTTTCCCGTAAGC | 20 |
| GhActin-RT-F | TCCTCCGTCTTGACCTTG | 18 |
| GhActin-RT-R | TGTCCGTCAGGCAACTCA | 18 |
| GhPLTAZ01-F | ggtaccTTCCTATTCTTCTTTCTCCCAG | 28 |
| GhPLTAZ01-R | tctagaTGGTATGGTGGTTTCCTTTC | 26 |
| GhPLTAZ15-F | ggtaccAATCGAGAATCCATTGTCCGTG | 28 |
| GhPLTAZ15-R | tctagaTTGTTCACCATTGCTGCTTCTA | 28 |
| GhPLTAZ01-JD-F | TCTCCCAGAACTGGCTCCA | 19 |
| GhPLTAZ01-JD-R | TGACATTGGTATGGTGGTTTCC | 22 |
| GhPLTAZ15-JD-F | AATCGAGAATCCATTGTCCGTG | 22 |
| GhPLTAZ15-JD-R | TTGTTCACCATTGCTGCTTCTA | 22 |
| NtActin-RT-F | CCTGAGGTCCTTTTCCAAC | 19 |
| NtActin-RT-R | GATTCCGGCAGCTTCCATT | 19 |
| NtUBQ4-RT-F | GAATGCAGATCTTCGTGAAG | 20 |
| NtUBQ4-RT-R | TTCTGGATATTGTAGTCAGCC | 21 |
| SlActin-RT-F | GGAATGGGACAGAAGGAT | 18 |
| SlActin-RT-R | CAGTCAGGAGAACAGGGT | 18 |
| SlUBQ-RT-F | GTAAGGAGTGCCCTAATGCTGA | 22 |
| SlUBQ-RT-R | CAATCGTCCAGCCTTGTTGTAA | 22 |
| SlAPX-RT-F | GATGTTCCCTTTCACCCTG | 19 |
| SlAPX-RT-R | CCCCTCTTTTTCCCCACT | 18 |
| SlCAT-RT-F | GGTGGATTATTTGCCCTCG | 19 |
| SlCAT-RT-R | ACCTCTCCCCTGCCTGTT | 18 |
| SlPOD-RT-F | CACATACATTTGGAAGG | 17 |
| SlPOD-RT-R | TTTATTGTTGGATCAGGGC | 19 |
| SlSOD-RT-F | GGCCAATCTTTGACCCTTTA | 20 |
| SlSOD-RT-R | AGTCCAGGAGCAAGTCCAGT | 20 |
| SlP5CS-RT-F | ACGGTCTTTACAGTGGTC | 18 |
| SlP5CS-RT-R | AAGCAGCATACATAGCAG | 18 |
